# **A wearable platform for closed-loop stimulation and recording of single- neuron and local field potential activity in freely-moving humans**

**Uros Topalovic,<sup>1,2</sup> Sam Barclay,<sup>1</sup> Chenkai Ling,<sup>1</sup> Ahmed Alzuhair,<sup>1,3</sup> Wenhao Yu,<sup>1</sup> Vahagn Hokhikyan,<sup>1</sup> Hariprasad Chandrakumar,<sup>1</sup> Dejan Rozgic,<sup>1</sup> Wenlong Jiang,<sup>1</sup> Sina Basir-Kazeruni,<sup>1</sup> Sabrina L. Maoz,<sup>4,5</sup> Cory S. Inman,<sup>6</sup> Jay Gill,<sup>2,5</sup> Ausaf Bari,<sup>7</sup> Aria Fallah,<sup>7</sup> Dawn Eliashiv,<sup>8</sup> Nader Pouratian,<sup>9</sup> Itzhak Fried,<sup>2,7</sup> Nanthia Suthana,<sup>2,4,7,10,11\*</sup> Dejan Markovic,<sup>1,11\*</sup>**

<sup>1</sup>Department of Electrical and Computer Engineering, University of California, Los Angeles, CA 90095, United States

<sup>2</sup>Department of Psychiatry and Biobehavioral Sciences, Jane and Terry Semel Institute for Neuroscience and Human Behavior, University of California, Los Angeles, Los Angeles, CA 90095, United States

<sup>3</sup>King Saud University, Riyadh, Saudi Arabia

<sup>4</sup>Department of Bioengineering, University of California, Los Angeles, Los Angeles, CA 90095, United States

<sup>5</sup>Medical Scientist Training Program, David Geffen School of Medicine, University of California, Los Angeles, Los Angeles, CA 90095, United States

<sup>6</sup>Department of Psychology, University of Utah, Salt Lake City, UT 84112, United States

<sup>7</sup>Department of Neurosurgery, David Geffen School of Medicine, University of California, Los Angeles, Los Angeles, CA 90095, United States

<sup>8</sup>Department of Neurology, University of California, Los Angeles, Los Angeles, CA 90095, United States

<sup>9</sup>Department of Neurological Surgery, UT Southwestern Medical Center, Dallas, TX 75390, United States

<sup>10</sup>Department of Psychology, University of California Los Angeles, Los Angeles, Los Angeles, CA 90095, United States

<sup>11</sup>Co-senior authorship

\*Correspondence:

[nanthia@ucla.edu](mailto:nanthia@ucla.edu)

[dejan@ucla.edu](mailto:dejan@ucla.edu)

25 **Abstract**

26 Advances in technologies that can record and stimulate deep-brain activity in humans have led  
27 to impactful discoveries within the field of neuroscience and contributed to the development of  
28 novel therapies for neurological and psychiatric disorders. Further progress, however, has been  
29 hindered by device limitations in that recording of single-neuron activity during freely-moving  
30 behaviors in humans has not been possible. Additionally, implantable neurostimulation devices,  
31 currently approved for human use, have limited stimulation programmability and lack full-duplex  
32 bi-directional capability. Here, we developed a wearable bi-directional closed-loop  
33 neuromodulation system (Neuro-stack) and used it to record single-neuron and local field  
34 potential activity during stationary and ambulatory behavior in humans. Together with a highly  
35 flexible and customizable stimulation capability, the Neuro-stack provides an opportunity to  
36 investigate the neurophysiological basis of disease, develop improved responsive  
37 neuromodulation therapies, explore brain function during naturalistic behaviors in humans, and  
38 consequently, bridge decades of neuroscientific findings across species.

39 **Keywords** – single neuron, intracranial electrical stimulation, wearables, closed-loop  
40 neuromodulation, phase-locked stimulation, local field potentials, human

## 41 **Introduction**

42 Understanding brain function and its relation to cognition and behavior requires the integration of  
43 multiple levels of inquiry, ranging from the examination of single cells all the way up to the probing  
44 of human experience under naturalistic conditions. One major barrier that separates these  
45 approaches is the inability to record from single neurons during naturalistic behaviors in humans,  
46 which frequently involve full-body locomotion as well as twitches, gestures, and actions of the  
47 face and hands. This is problematic because behaviors that are studied in animal neurobiology  
48 are done almost exclusively in freely-moving animals (e.g., rodents) [1-2]. Thus, major gaps  
49 remain between understanding findings from neuroscience studies in animals to those in humans.

50 In parallel with progress in neuroscience, the medical field has seen a significant increase  
51 in the use and development of therapies delivered through implanted neural devices to treat and  
52 evaluate abnormal brain activity in patients with neurologic and psychiatric disorders [3-8].  
53 However, current implantable devices do not allow for the recording of single-neuron activity, nor  
54 do they allow for extensive customization of stimulation parameters (e.g., pulse shape, precise  
55 timing with respect to ongoing neural activity), capabilities which would significantly expand the  
56 types of research questions that can be investigated. Furthermore, there is a critical need for  
57 robust data analytic capabilities on these devices (e.g., using deep learning and artificial  
58 intelligence) to deal with the large and complex neural data in real-time. Finally, an additional  
59 impediment in developing new responsive neurostimulation treatments is the lack of a  
60 customizable bi-directional interface that can record simultaneously with stimulation (full-duplex)  
61 and thus “talk” with the brain at the speed of behavior and cognition.

62 Since neural mechanisms underlying specific behaviors or brain disorders can span  
63 across a large population of cells, often from widespread brain regions [9, 10], there is a need for  
64 implantable neural devices to record from an increased number of channels across the brain.  
65 Further, there is a need for a sufficient temporal scale (<1 ms) to capture both single-neuron and

66 local field potential (LFP) activity. Importantly, such technology should have a minimal impact on  
67 a person's ability to move freely. Current neuroimaging techniques used in humans (e.g.,  
68 functional magnetic resonance imaging [fMRI], scalp electroencephalography [EEG],  
69 magnetoencephalography [MEG]) have insufficient combined spatial and temporal resolution to  
70 record single-neuron activity. Intracranial electrophysiological studies, using micro-wire  
71 electrodes in epilepsy patients, can record LFPs and single-unit activity, however research  
72 participants must be tethered to large equipment and remain immobile. The high spatiotemporal  
73 resolution of LFPs (1–10 mm,  $\geq 1$  ms) and single-unit (10–50  $\mu\text{m}$ ,  $< 1$  ms) recordings comes at the  
74 cost of brain coverage, which is mitigated, whenever possible, with a larger number of recording  
75 channels through clinically-guided implantation of 10-15 depth electrodes (i.e., in stereo-EEG  
76 [SEEG]). In this realm, there are two possibilities for neuroscience studies to leverage clinical  
77 opportunities where individuals have electrodes implanted in their brains. The first is to use in-  
78 clinic research equipment (e.g., Blackrock Microsystems [11], Neuralynx [12], Nihon Kohden [13],  
79 Ripple Neuro [14]) with immobile participants undergoing clinically indicated SEEG who  
80 participate in voluntary research studies while hospitalized. Stimulation research studies are  
81 similarly done bedside, primarily using open-loop stimulation [15-21], although recent studies  
82 have begun to explore the use of closed-loop stimulation [22-26]. Critically, the equipment used  
83 in these research studies is expensive (up to  $\sim$ \$200K), bulky, and does not allow for extensive  
84 on-device customization of stimulation or complex real-time analyses for closed-loop stimulation.  
85 The second option is to use FDA-approved commercially available neural devices already  
86 implanted in several thousand individuals to treat epilepsy and movement disorders (e.g.,  
87 Neuropace RNS System [27] and Medtronic Percept [28]). These chronically implanted devices  
88 offer research participants mobility at the expense of using large macro-recording electrodes that  
89 cannot record single-unit activity, fewer channels (usually 4 bipolar), and lower sampling rates  
90 (250 Hz). Other investigational devices such as the Medtronic Summit RC+S [29-31], allow for  
91 recording 16-channel intracranial EEG (iEEG) activity at up to 1 kHz sampling rates (no single-

92 units). However, they are not FDA-approved for clinical treatment and thus exist in only a handful  
93 of patients with an FDA investigational device exemption (IDE) approval, limiting their widespread  
94 use by the scientific community. Existing closed-loop implantable technologies also lack full-  
95 duplex ability, which allows for simultaneous stimulation and recording of neural tissue inclusive  
96 of unit and LFP activity. While research studies using these systems have given rise to several  
97 impactful neuroscientific discoveries [27, 32], the possibility of novel devices to one-day record  
98 from single neurons, deliver customizable closed-loop stimulation, and carry out complex data  
99 analytics in real-time would provide unparalleled opportunities for first-in-human scientific  
100 discovery and the development of more effective medical therapies for patients' neuropsychiatric  
101 disorders.

102 Here, we present a potential technological pathway towards future more advanced  
103 implantable technologies with the development of a miniaturized bi-directional neuromodulation  
104 external device (Neuro-stack) that can record up to 256-channel (128 monopolar/bipolar macro-  
105 recordings) iEEG and 32-channel single-unit/LFP activity from micro-wires during ambulatory  
106 behaviors in humans who have macro- and micro-wire depth electrodes implanted for clinical  
107 reasons. The Neuro-stack can deliver customizable closed-loop multi-channel (up to 32  
108 simultaneous) stimulation where parameters such as pulse shape, frequency, amplitude, pulse  
109 width, inter-pulse width, polarity, channel selection and timing (e.g., for phase-locked stimulation)  
110 are configurable. A major advantage of the Neuro-stack is its full-duplex capability that allows for  
111 the recording of neural activity in the presence of concurrent stimulation.

112 We include data acquired using the Neuro-stack showing single-unit, LFP, and iEEG  
113 activity recorded in twelve participants who had depth electrodes implanted for epilepsy  
114 evaluation. In one of these participants, we used the Neuro-stack to perform binary prediction of  
115 memory performance in real-time (69% F1-score) using neural activity recorded from medial  
116 temporal lobe (MTL) regions. We also demonstrated the Neuro-stack's ability to record single-  
117 neuron activity during walking behavior and deliver customized stimulation. These capabilities

118 can be useful for future studies investigating the neural mechanisms underlying naturalistic  
119 behaviors in humans and developing novel neuromodulation therapies for patients with brain  
120 disorders that will be effective in real-world settings.

## 121 **Results**

122 The Neuro-stack (Fig. 1a-b) provides a bi-directional neuromodulation platform for wide-band  
123 sensing and stimulation of deep-brain areas for basic and clinical neuroscience studies.  
124 Compared to much larger existing devices (Fig. S1) that are used bedside and carried on a cart,  
125 the Neuro-stack's small hand-held size enables concurrent stimulation and recording of real-time  
126 electrophysiology (single-unit and LFP activity) during freely-moving behavior (Fig. 2) by  
127 connecting to commonly used implanted macro- and micro-electrodes (Fig. 1c-d). Apart from its  
128 small form-factor and unique on-body wearability, the Neuro-stack can support:

- 129 1. *Recording* of up to 256 channels for a total of 128 monopolar or bipolar recordings with a  
130 sampling rate of up to 6,250 Hz. Further, wide-band sensing from up to 32 monopolar or  
131 bipolar recordings at up to 38.6 kHz allows for the recording of single-unit and LFP activity  
132 simultaneously.
- 133 2. *Flexible and programmable stimulation* (Fig. 3) allowing for delivery of bipolar/monopolar  
134 stimulation to any 32 out of 256 contacts simultaneously. Stimulation engines are current-  
135 controlled and allow the user to program current amplitude, frequency, timing, pulse  
136 shape, and other parameters (Fig. 3, Table S2).
- 137 3. *Closed-loop neuromodulation*. The Neuro-stack has built-in (hardware) oscillation power  
138 detection and thus the ability to trigger stimulation at a predefined phase of an oscillation  
139 (phase-locked stimulation [PLS] delivered at a particular phase of ongoing theta activity).  
140 Further, sensing of neural activity is concurrent with stimulation for true (full-duplex)  
141 closed-loop capabilities. Resources for designing custom closed-loop algorithms are  
142 available at both the embedded hardware and external software levels.

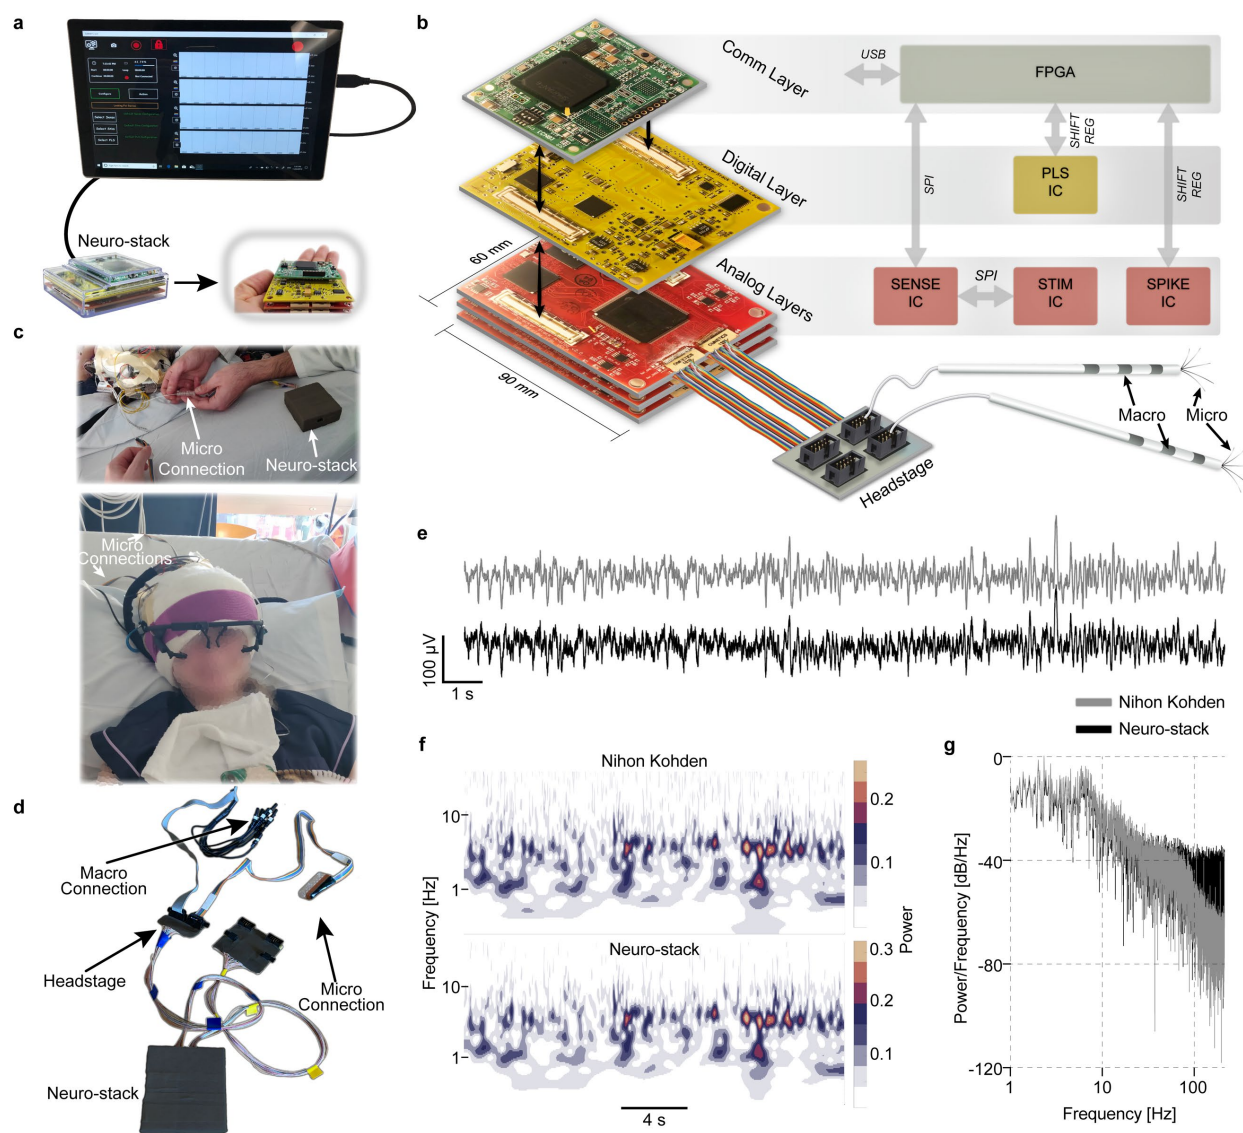

**Figure 1. Neuro-stack platform.** **a**, Neuro-stack and GUI-based tablet for single-neuron and local field potential (LFP) recordings, and closed-loop programmable phase-locked (PLS) stimulation. The tablet allows for selection of recording and stimulation channel(s), sampling rate, monopolar/bipolar recordings, and other parameters. Shown are the packaged (left) and unpackaged (right) versions. **b**, The Neuro-stack consists of three stacked layers: 1) Communication (Comm), 2) Digital, and 3) Analog. Presented are the printed circuit boards (PCBs, size =  $90 \times 60 \text{ mm}^2$ ) and  $5 \times 2$  pin (8 channels, 1 reference, and 1 ground, 10 total pins) Omnetics headstage connectors to which micro-electrodes can be connected (only top Analog layer connected). Note that each Analog layer receives up to two Omnetics connectors to connect with up to 4 electrodes through one headstage. A high-level block diagram of each layer is shown (right). The Comm Layer contains a FPGA (field-programmable gate array) that mediates command and data transmission (via USB) between external software and integrated circuit (IC) chips. The Digital Layer contains the PLS IC. The Analog Layer contains chips for sensing (Sense IC) and stimulation (Stim IC). Three Analog layers are shown to allow recording of 192 channels ( $64 \times 3$  layers). Serial peripheral interface (SPI) is used for FPGA communication with the Sense and Stim ICs, and shift register for FPGA communication with the PLS and Spike ICs. **c**, The Neuro-stack connected to micro-electrodes in a participant wearing an eye-tracking system. **d**, Shown are 10-pin touch proof jumpers for macro-electrode and 10-pin connectors (e.g., Adtech) for micro-electrode recordings. **e**, Example data recorded simultaneously using a clinical monitoring system (Nihon Kohden, gray) and Neuro-stack (black) showing similarity of signals. **f**, Example power spectrograms from data (**e**) showing concordant activity patterns. Frequency (0.1–32 Hz) is shown using a logarithmic scale. **g**, Example normalized power spectral density (PSD) plots from data shown in **e**.



- 143 4. *Software support* that comes in two formats. First, a turnkey graphical user interface (GUI)  
144 running on a Windows-based tablet or laptop is available for research purposes (Fig. 1a).  
145 Second, a full-access application programming interface (API) library written in C++ allows  
146 the user to build custom research open- and closed-loop stimulation capabilities for  
147 research studies (Fig. S3).
- 148 5. *Tensor multiplication accelerator* (Edge TPU, Fig. 2a, Fig. S3 middle) that is integrated  
149 with the Neuro-stack device, enabling an extended range of applications such as real-time  
150 inference for neural decoding (Fig. 4) or closed-loop stimulation.
- 151 6. *Wired or wireless mode*. The Neuro-stack platform can be externally controlled and  
152 powered via a USB cable or remotely controlled through a secure local network using a  
153 battery-powered configuration (Fig. 2a, Fig. S3). This flexibility allows researchers to  
154 perform wide-band recording and stimulation during either stationary or ambulatory  
155 (freely-moving) behavioral tasks.

156 The central hardware component of the Neuro-stack platform (Fig. 1a-b) consists of three printed  
157 circuit board (PCB) layers: 1) analog, 2) digital, and 3) communication. Each layer is embedded  
158 with one or several dedicated integrated circuit (IC) chips. The analog layer (Fig. 1b, bottom)  
159 contains mixed-signal sensing IC (Sense IC and Spike IC) and stimulation IC (Stim IC) chips,  
160 which were previously developed as part of the DARPA SUBNETS program [33-36]. A single  
161 Sense IC (one per analog layer) accepts neural activity from up to 64 electrode contacts fed into  
162 voltage-controlled oscillators (VCO), which serve as analog-digital converters (ADC). Each VCO  
163 ADC supports  $6,250/N$  Hz sampling frequencies, where  $N = 1, 2, 4, 8, \dots, 128$  and a  $100 \text{ mV}_{pp}$  linear  
164 input dynamic range with  $12/21$  (macro/micro) bits of resolution, ensuring that the underlying  
165 neural signal is captured in the presence of large artifacts (e.g., from stimulation). The Sense IC  
166 contains digital nonlinearity correction to account for nonlinear amplification across the input  
167 range. Moreover, it also contains a digital logic for adaptive stimulation artifact rejection that  
168 subtracts a template stimulation artifact extracted from adjacent channels [36]. The total power



169 consumption per channel is 8.2  $\mu$ W. A single Spike IC (one per analog layer) accepts neural  
170 activity from up to 8 micro-wire contacts and supports sampling rates of up to 38.6 kHz [37]. A  
171 single Stim IC contains eight engines that can, with the appropriate configuration, drive current  
172 through any individual or combination of the connected 64 electrode contacts. Stimulation output  
173 current is highly configurable (Fig. 3a, b), including selection of amplitude, frequency, and multiple  
174 or custom waveform shapes. This flexible programmability allows for stimulation using previously  
175 used burst protocols [38-40] as well as exploration of novel stimulation patterns for investigative  
176 research and therapy development. These capabilities also enable increased degrees of freedom  
177 (timing, amplitude parameters; Fig. 3) compared to currently available intracranial  
178 neurostimulation systems (Table S2).

179 The Neuro-stack's digital layer (Fig. 1a-b, middle) routes signals between the analog and  
180 communication layers and contains a custom IC chip (PLS IC) for closed-loop stimulation based  
181 on the detected oscillatory (e.g., theta) phase in the recorded neural signal coming from the  
182 analog layer to enable PLS [41-42]. A field-programmable gate array (FPGA, Xilinx Spartan 6  
183 board) serves as a communication layer (Fig. 1a-b, top, Fig. S3) between an external devices and  
184 custom ICs (Fig. 1b).

185 The Neuro-stack uses the serial peripheral interface (SPI) at 12 MHz (Sense IC and Stim  
186 IC) and serial shift register (PLS IC and Spike IC) for internal communication between layers and  
187 IC chips and a USB interface for external communication and power supply. The device is  
188 assembled by physically stacking the described layers (Fig. 1a-b). Furthermore, one Neuro-stack  
189 device supports up to four analog layers at the same time, for up to 256 micro-wire (LFP) electrode  
190 contacts (64 per layer) and up to 32 micro-wire (single-unit) electrode contacts (8 per layer).

191 A ready-to-use GUI is available (connected to the Neuro-stack via USB) and allows for  
192 real-time multi-channel monitoring and control of neural recording and stimulation (Fig. 1a). A  
193 platform-agnostic API library written in C++ that allows for custom applications and experiments  
194 is also provided. To allow ambulatory experiments, the Neuro-stack can be wirelessly controlled

195 using the Coral Development Board (CDB; Fig. S3, TPU in Fig. 2a), an ARM-based single-board  
196 computer, running a Mendel Linux distribution. Similar microprocessors with wireless capabilities  
197 such as a Raspberry Pi can also be used for this purpose. Our Neuro-stack setup included an  
198 ARM-compiled Neuro-stack API, which supports wireless applications through a secure local Wi-  
199 Fi (2.4 or 5 GHz) network created using the included API library. Only an experimental device that  
200 uses a secure (X.509 certification) connection to a local server can control the Neuro-stack. The  
201 CDB contains an onboard TPU (Fig. 2a), which can make real-time inferences for neural decoding  
202 or closed-loop applications (e.g., Stationary Verbal Memory Task section, Fig. 4).

### 203 **In-vitro Sensing and Stimulation**

204 The Neuro-stack IC chips (i.e., Stim, Sense, Spike, PLS) were validated in-vitro separately [33-  
205 34, 36-37, 41] and some (Sense and Stim) as part of an implantable system [34]. Before moving  
206 to human in-vivo studies, in-vitro validation of all chips in the Neuro-stack was also completed.  
207 The setup for validating sensing capability included the feeding of pre-recorded analog neural  
208 data via an NI PXI System (digital to analog converter) through a phosphate-buffered saline (PBS)  
209 solution, use of an oscilloscope to observe true signals at front-end inputs, and a computer to  
210 control and power the Neuro-stack (Fig. S4, Online Methods). The captured signals were of  
211 satisfactory quality (Sense and Spike IC, Fig. S5a,b).

212 PLS was also tested using the same in-vitro setup (Fig. S4). For 300 s of LFP data, the  
213 results showed 400 detections within the theta band (3–8 Hz) and triggered stimulations with a  
214 circular variance of 0.3 [42].

215 Measurements of stimulation and synchronization delivery delays were also characterized  
216 for ensuring accurate closed-loop implementation as well as alignment between behavioral  
217 stimuli, neural data, and other devices that run in parallel. First, the round-trip delay, important for  
218 closed-loop stimulation, was measured from sensed input to stimulation output by feeding a train  
219 of 50 pulses into the sensing front-end. The pulse rising edge detection triggered stimulation on

220 the CDB software side (connected to the Neuro-stack via USB; Fig. S5c). Input/output  
221 observations by the oscilloscope showed a  $1.57 \pm 0.19$  ms round-trip delay (Fig. S5d). This result  
222 was consistent with the PLS-based round-trip delay of  $1.7 \pm 0.3$  ms measured from the sensed  
223 input to stimulation output [42]. Second, synchronization with external devices was done by  
224 timestamping neural samples using the CDB; accuracy depended on the system latency through  
225 hardware and software. We applied the same approach as the round-trip delay with the addition  
226 of sending a test pulse on a general-purpose pin once the sample reached the timestamping step  
227 (Fig. S5c), which resulted in a delay, measured from sensed input to CDB output, of  $0.56 \pm 0.07$   
228 ms (Fig. S5e). For more details see Online Methods – Neuro-stack in-vitro testing section.

### 229 **In-vivo Sensing and Stimulation**

230 Twelve participants with indwelling macro- and micro-wire electrodes implanted for  
231 pharmaco-resistant epilepsy volunteered for the study by providing informed consent according to  
232 a University of California, Los Angeles (UCLA) medical institutional review board (IRB) approved  
233 protocol. Each Behnke-Fried macro-micro depth electrode (Ad-Tech Medical, Racine, WI)  
234 contained 7-8 macro-contacts and 9 (8 recording, 1 reference) 40- $\mu$ m diameter platinum-iridium  
235 microwires [43] inserted through the macro-electrode's hollow lumen. Neural activity was  
236 recorded from macro- and micro-wire contacts using the Neuro-stack during wakeful rest in all  
237 participants (Online Methods - Participants) and from various brain regions (Table S1; Online  
238 Methods – Electrode Localization). The Neuro-stack setup was done bedside (Fig. 1c-d) or on-  
239 body during ambulatory movement (Fig. 2a), where the system was connected to implanted  
240 electrodes using a custom-built connector (i.e., touch-proof, Cabrio, and Tech-Attach connectors  
241 for commercial Behnke-Fried macro- and micro-electrodes, respectively). The main objective of  
242 the in-vivo validation studies was to test recording of single-unit and LFP activity and macro-  
243 stimulation during rest and behavioral tasks (see Ambulatory Walking Task and Stationary Verbal

244 Memory Task sections). The PLS closed-loop functionality has been tested in-vitro [42] with  
 245 expected in-vivo validation to be a part of future behavioral studies.

246 iEEG data was also recorded simultaneously with the Neuro-stack using commercially  
 247 available electrophysiological recording systems (i.e., Nihon Kohden) for comparison purposes.

248 Example raw iEEG activity traces from one participant is shown using simultaneous Nihon

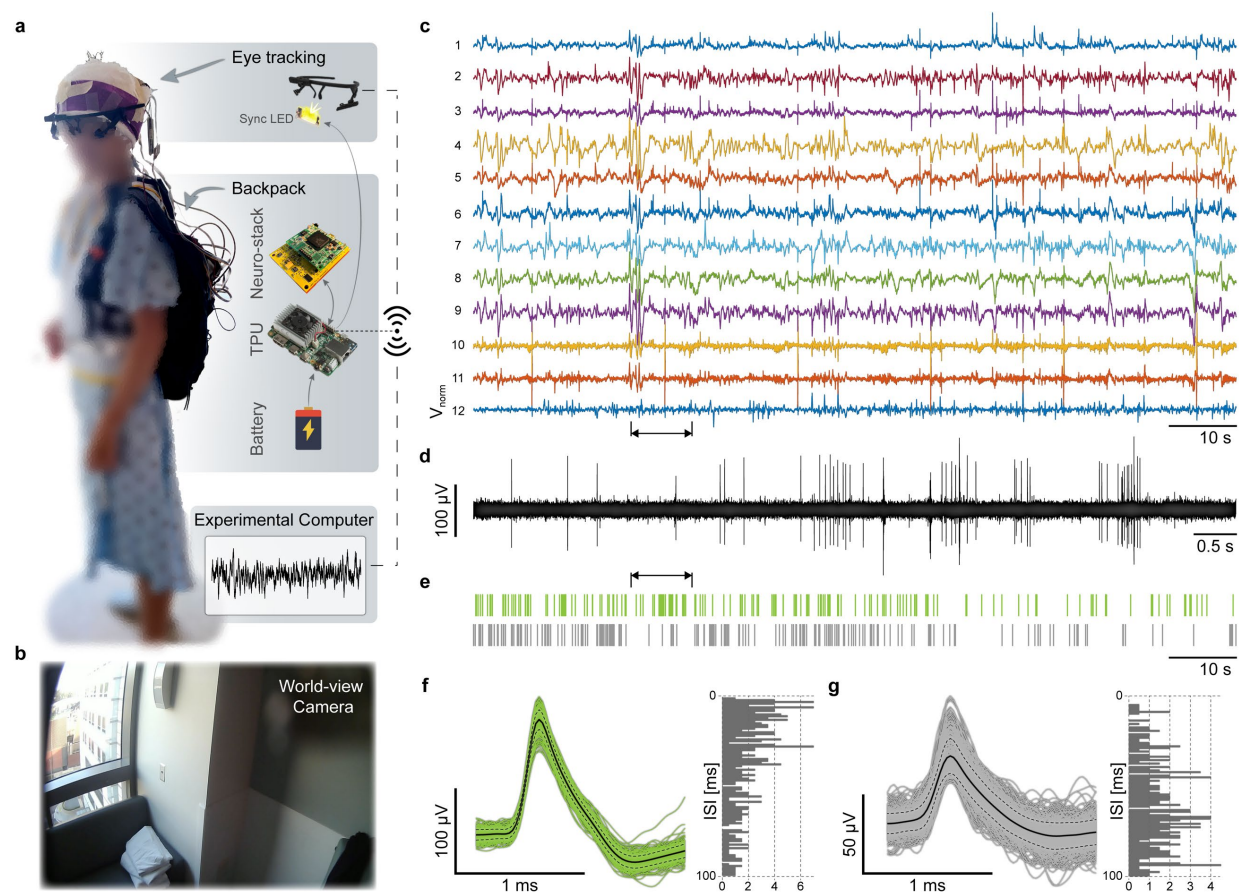

**Figure 2. Neuro-stack as a wearable platform for recording neural activity during ambulatory behavior in humans.** **a**, An example research participant wearing the backpack carrying the Neuro-stack system, a single board computer with a tensor processing unit (TPU), and a battery, to allow for recording of single-neuron and LFP activity during ambulatory behavior. The participant was also wearing an eye-tracking device that keeps track of head direction, pupil size changes, eye movements. Data captured from the eye-tracker was synchronized with the neural data using a programmable light emitting device (LED) that is visible on the eye-tracker world-view camera. Wireless communication between the Neuro-stack, eye-tracker, and other external monitoring devices is enabled through a Wi-Fi access point on the TPU device. **b**, Neural activity was recorded during an ambulatory task where participants walked repeatedly (10 times) between two opposite corners of a 5 x 5 ft<sup>2</sup> room (from X to Y, Fig.S2b). Example video frame from the eye-tracking world-view camera as an example participant approached point Y in the room (bottom). **c**, Neural activity (voltage-normalized separately for each channel) from 12 micro-electrode channels (1-6: hippocampus, 6-12: anterior cingulate) during the ambulatory walking task from an example participant. **d**, 10 s of filtered data from channel 12 (arrows point to corresponding sections on **c** and **e**). **e**, A raster plot of two single-units isolated from channel 12. **f**, The first single-unit isolated from channel 12 and its corresponding inter-spike interval (ISI) histogram (right). **g**, The second single-unit isolated from channel 12 and its corresponding inter-spike interval (ISI) histogram (right).

249 Kohden and Neuro-stack recordings (Fig. 1e), together with time-frequency power spectrum data  
250 (frequency band: 1 – 32 Hz; Fig. 1f), and PSD plots (frequency band 1 – 250 Hz; Fig. 1g).

251 Stimulation was performed in three participants to test stimulation artifact propagation  
252 across channels and assess associated statistics with varying parameters. In the first two  
253 participants, bipolar macro-stimulation was applied to the left hippocampus (amplitude: 0.5 mA;  
254 Pulses/burst: 11; waveform shape: rectangular; pulse width: 1ms; frequency: 100 Hz). After  
255 successful delivery was observed in surrounding channels, a series of bipolar macro-stimulation  
256 bursts with varying parameters was delivered in a third participant. The parameter test space  
257 included [amplitude, frequency] combinations of [0.25, 0.50, 0.75, 1.00, 1.25] mA × [60, 80, 100,  
258 120, 140] Hz where every combination was repeated four times for a total of 100 macro-  
259 stimulation bursts (Fig. 3c) with the following parameters (pulse width: 1.28 ms, interphase width:  
260 150  $\mu$ s, rectangular pulse shape, interburst delay: 16.67 s). Stimulation delivery (Fig. 3c–entire  
261 session; Fig. 3d–multi burst; Fig 3e–single burst level) was observed on 40 nearby recording  
262 channels, obtained using the Sense IC (sampling rate: 6250 Hz). Overlaid pulses from one of  
263 the bursts with the same parameters (1.25 mA, 60 Hz) showed successful delivery across all  
264 channels (Fig. 3f – upsampled to 25 kHz and interpolated). Further, all pulses from the same burst  
265 showed consistent artifacts in the channel adjacent to the stimulation site (Fig. 3g – mean  $\pm$  std).  
266 Higher stimulation amplitudes resulted in lower variability (std) in delivered power (Fig. 3h) while  
267 higher burst frequency resulted in higher variability across channels (Fig. 3i). Note, that  
268 stimulation artifacts were not caused or affected by channel saturation (Fig. 3f) with absolute  
269 voltage levels much lower than the 50 mV cut-off. Results (Fig. 3h,i) suggest that deviation of  
270 underlying neural activity is not the only cause of artifact waveform uncertainty. Future studies  
271 that model and predict artifact propagation could use stimulation mapping prior to studies to  
272 characterize effects and adjust expected values and deviations accordingly.



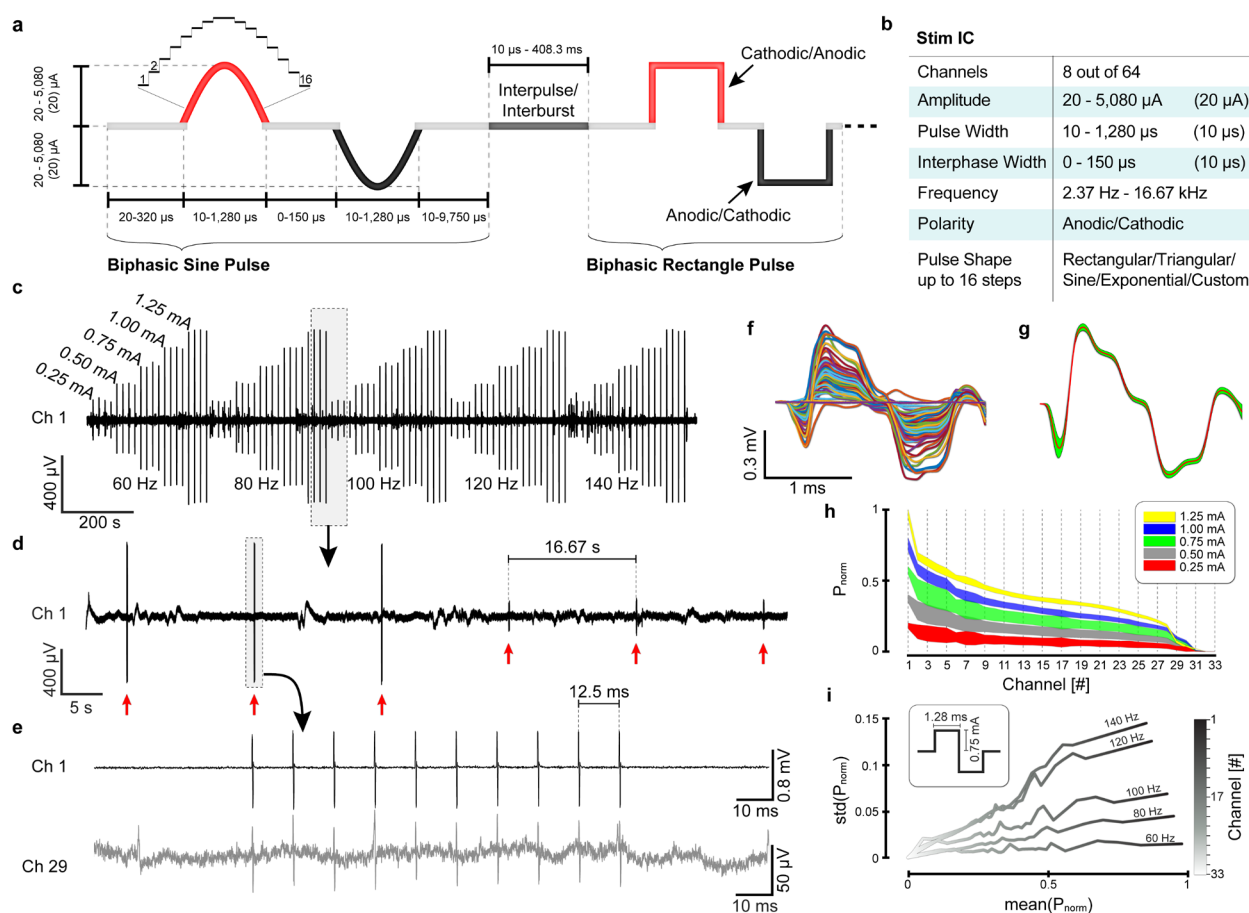

**Figure 3. Neuro-stack as a programmable closed-loop neuromodulation system.** **a**, Stimulation parameters can be customized including frequency, amplitude (0-5080 mA in steps of 20 mA), polarity (anodic/cathodic), timing (of pulse width, inter-phase width and inter-pulse/burst interval) and pulse shape (e.g., sinusoidal or rectangular pulses shown). **b**, Key features and capabilities on the stimulation integrated circuit (Stim IC) including the number of channels (i.e., 8 out of 64 per analog layer) that can be selected for stimulation, amplitude, configurable pulse shapes where amplitude in each of up to 16 steps (**a**) can be programmed for custom waveform design, frequency, polarity, pulse width (**a**, 10-1280  $\mu$ s, steps: 10  $\mu$ s), and inter-phase width (**a**, 0-150  $\mu$ s, steps: 10  $\mu$ s). **c**, Example macro-electrode channel recorded during the delivery of macro-stimulation, which was delivered with varying combinations of amplitudes  $\times$  frequencies [(0.25, 0.5, 0.75, 1.00, 1.25) mA  $\times$  (60, 80, 100, 120, 140) Hz]. Each stimulation burst contained 10 biphasic (pulse width = 1.28 ms) after which a delay of 16.67 seconds occurred before the next burst cycle. **d**, Zoomed-in view of **c** (outlined box) where six stimulation bursts (red arrows) are shown with different parameters (burst 1-3: 1.25 mA, 80 Hz; burst 4-6: 0.25 mA, 100 Hz). **e**, Zoomed-in view of a single burst (outlined box) from the same channel in **d** and another example channel (29). **f**, Time-aligned bipolar pulses from a stimulation burst (10 pulses, 1.25 mA) from all channels ( $n=33$ ). **g**, Mean and standard deviation (std) values of all time-aligned bipolar stimulation pulses from example recording channel (1). **h**, Normalized power (mean and std) of the propagated stimulation pulses across channels ( $n=33$ ) recorded with respect to varying stimulation current (0.25–1.25 mA). **i**, Std of normalized power (std(power/max[power])) as a function of mean normalized power (mean(power/max[power])) differentiates pulse propagation across channels with respect to varying stimulation burst frequencies (60-140 Hz, steps: 20 Hz) with a fixed pulse width (1.28 ms) and current amplitude (0.75 mA). Electrode channels are marked in shades of gray ( $n=33$ ).

## 273 **Ambulatory Walking Task**

274 We used the wireless Neuro-stack setup (Fig. 2a) in six participants while they walked in their  
275 hospital rooms to record single-neuron activity from various brain regions (Table S1) synchronized  
276 with world-view and eye-tracking cameras (Fig. 2b, Fig. S2c-d, Online Methods).

277 The first four participants walked freely around the room, during which motion artifacts in  
278 recordings were examined. The use of nearby electrodes (same bundle) as a reference resulted  
279 in reduced common noise artifacts using the front-end amplifiers (Fig. S2a). The last two  
280 participants were walked from one point of the room to another ten times (Fig. S2b). Raw (line  
281 noise removed) 12-channel neural activity recorded from one participant during walking is shown  
282 in Figure 2c. Although motion artifacts were reduced, slow voltage transients during movement  
283 were still present (Fig 2c). Nonetheless, single-unit spikes were preserved (Fig. S2a-right) and  
284 detected using a bandpass filter [300 – 3000 Hz] (Fig. 2d, Fig. S2a-right). After spike sorting [44]  
285 of the data, single-unit clusters were successfully isolated (Fig. 2e-g).

## 286 **Stationary Verbal Memory Task**

287 Neuro-stack's ability to record neural data in real-time and decode behavioral performance was  
288 tested bedside in a participant with indwelling micro-wire electrodes while they completed a verbal  
289 memory task (Fig. 4a). During the task, the participant was instructed to learn (encode) a list of  
290 ten words that were presented on an iPad screen and then verbally recall as many words as  
291 possible after a brief delay (30 s). During the delay, a non-mnemonic (distraction) task was  
292 completed that involved identifying whether the sum of the two random numbers (1-9) was either  
293 odd or even. Encoding, distraction, and recall blocks were repeated nine times during the  
294 experimental paradigm while the Neuro-stack recorded LFP activity from sixteen micro-wire  
295 channels, which was used to decode memory performance in real-time using artificial neural  
296 networks.



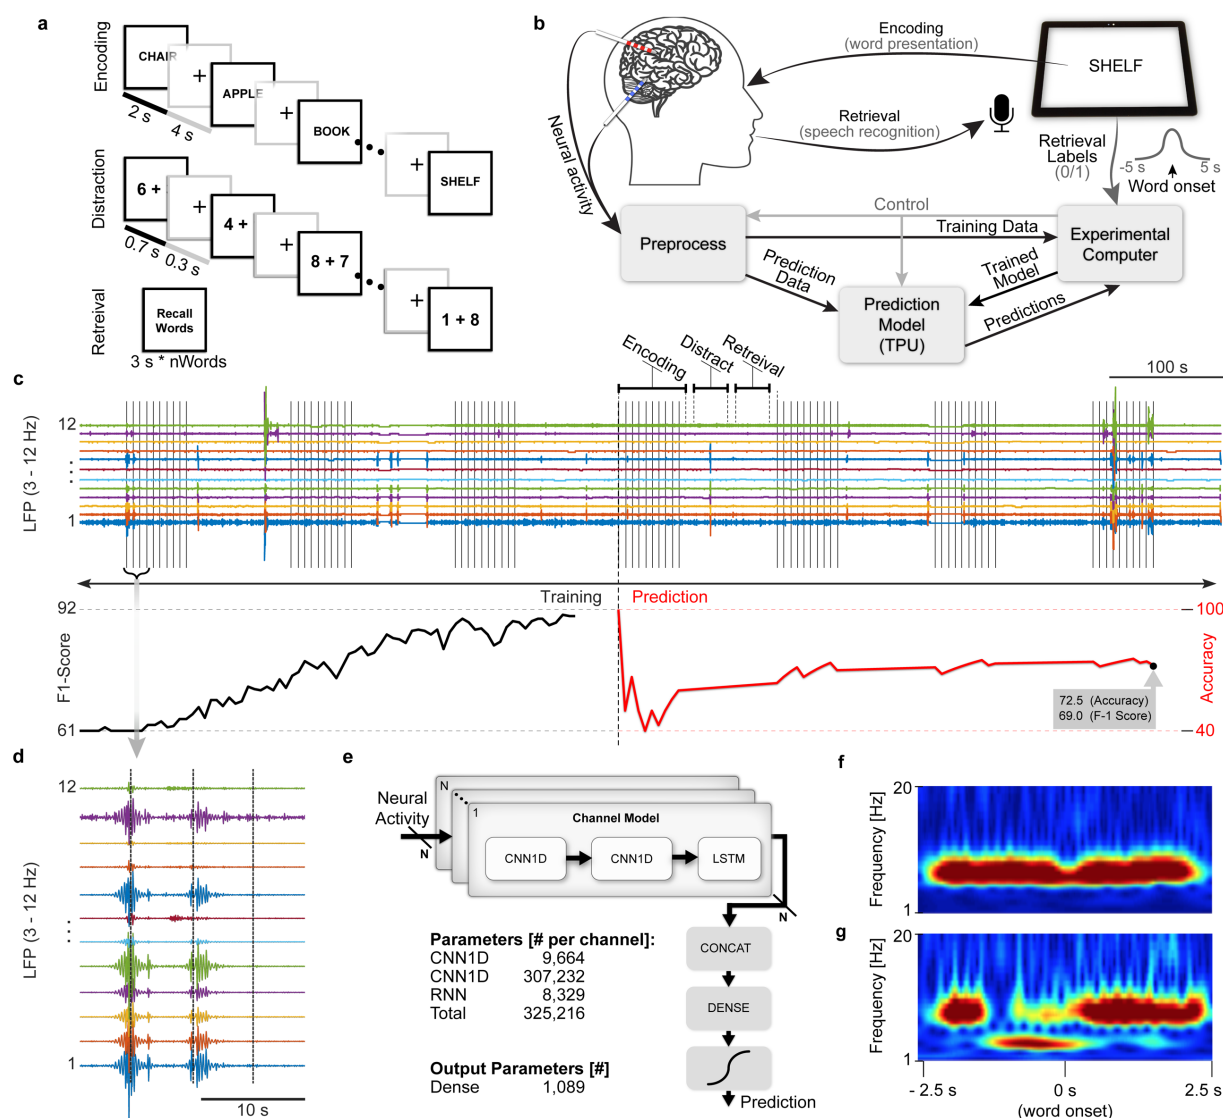

**Figure 4. Decoding memory performance with the Neuro-stack system.** **a**, Neural activity was recorded during completion of a verbal memory task, which included three phases: 1) Learning (encoding) during which a list of words presented (2 s each, 0.8 s inter-stimulus interval [ISI]), 2) Distraction, during which numbers were presented serially (0.7 s each, 0.3 s ISI) and participants were instructed to respond odd/even, and 3) Recall (retrieval) where previously presented words were recalled. **b**, Neuro-stack recording setup and processing pipelines used during the memory task. A tablet was used to present words during Encoding and record to identify in real-time the spoken words recalled during Retrieval (using speech recognition). Minimally processed data was then fed into an external computer with synchronized retrieval results. The neural network model (Model, **e**) was trained in real-time to predict retrieval performance based on neural activity during encoding. The model was then ported to the TPU to perform real-time predictions. **c**, Filtered theta (3–12 Hz) activity from the left hippocampus (LHC) is shown since it was the most critical feature used by the trained neural network model to predict memory (top). Vertical lines mark the onset of each word (10) during 7 repetitions (blocks) shown of the memory task. Decoding performance (accuracy) is shown (bottom) during the first three blocks, which were used to train the neural network (Training) and the associated aligned F1-Score. The last four blocks were used to predict memory performance (Predict) and the associated aligned F1-Score. **d**, Zoomed-in-view of example theta activity shown in **c**. **e**, The neural network model (2 × CNN1D + LSTM + Dense network) parameters. **f**, Time-frequency representation of the first most significant feature (from the trained CNN layer activation filter), which highlights theta power during encoding. **g**, Time-frequency representation of the second most significant feature (trained CNN layer activation filter), which highlights temporal patterns in theta activity with increases particularly after the onset of word presentation.

297 The TPU device (Fig. S3) was integrated with the Neuro-stack and used to embed a neural  
298 network model that was large enough to generalize across participants but small enough to be  
299 successful with using solely on-system computation. Artificial neural networks were pre-trained  
300 on multi-channel raw (downsampled) LFP data previously acquired using a Blackrock Neuroport  
301 recording system. Offline pre-training performance successfully differentiated remembered from  
302 forgotten words during recall with a test F1 score ( $F_1 = 2 \times (P \times R) / (P + R)$ ,  $P$  – precision,  $R$  –  
303 recall) of  $88.6 \pm 5.5\%$  and a test accuracy of  $91.7 \pm 3.3\%$ . The model was built and trained in a  
304 Keras (TensorFlow backend) framework after detailed comparison with commonly used machine  
305 learning methods (Support Vector Machine [SVM], Principal Component Analysis [PCA] plus  
306 SVM, various neural network architectures; Table S3). The decoder consisted of an input  $2 \times$   
307 CNN1D + LSTM layers that extracted multi-channel LFP features and an output Dense (fully  
308 connected network) + Classifier layers (Fig. 4e). For further details see Online Methods.

309 During the memory task, the offline model's output layers were retrained in real-time on  
310 an external computer. The trained model was then translated to TensorFlow Lite and ported to  
311 the Edge TPU, to predict memory during the last four task blocks (Fig. 4b). The training phase  
312 and improving accuracy/loss metrics for an example participant are presented in Fig. 4c. The  
313 online test (prediction) phase resulted in an F1 Score of 69% (Fig. 4c-bottom). Average total  
314 power at theta frequency bands (Fig. 4d) indicated a significant difference between correct and  
315 missed trials. A time-frequency heatmap of the second CNN1D layer activation filters [45]  
316 confirmed that theta multimodal activity timed to the population activations in the left and right  
317 hippocampus was used by the model to identify correctly recalled words (Fig. 4f, g).

## 318 Discussion

319 We present the Neuro-stack, a novel miniaturized recording and stimulation system that can  
320 interface with implanted electrodes in humans during stationary (bedside) or ambulatory  
321 behaviors. The Neuro-stack can record up to 256 channels of LFP/iEEG activity and 32 channels

322 of single-/multi-unit activity. Macro-stimulation can also be delivered through any of the channels  
323 (up to 32 channels simultaneously) during recording, allowing for bi-directional full-duplex  
324 capability. This is a significant advantage over existing systems in that it allows for  
325 characterization of ongoing neural consequences of stimulation as well as precisely timed closed-  
326 loop stimulation.

327 A second major advantage of the Neuro-stack over existing systems is its smaller hand-  
328 held size that enables it to be carried on-body and be wirelessly controlled. These features  
329 allowed us to record single-neuron waveforms (spikes) during walking, which to our knowledge  
330 are the first recordings of their kind in humans. Future studies using the Neuro-stack could  
331 determine the neural mechanisms underlying human freely-moving behaviors (e.g., spatial  
332 navigation) to identify, for example, spatially selective neurons and their modulation by cognition  
333 (e.g., hippocampal place or entorhinal grid cells [46]) that have been previously discovered in  
334 freely-moving animals. Doing so would bridge decades of findings between animals and humans  
335 and potentially lead the way towards scientifically informed therapies for hippocampal-entorhinal-  
336 related dysfunctions (such as Alzheimer's disease). While we did not identify any spatially  
337 selective single-units in the current study, possibly due to the restricted spatial environment in  
338 which walking took place, further analysis from our ambulatory task and other future studies using  
339 the Neuro-stack over longer distances (e.g., hallways) may be able to identify these neurons in  
340 humans.

341 A third advantage of the Neuro-stack is its API that allows fast and flexible prototyping of  
342 the experiments with range of backend functions that accurately align behavioral and neural  
343 events (i.e., spikes). We demonstrated how the Neuro-stack's API integrated with a TPU can, in  
344 real-time, decode verbal memory performance in a single participant with accuracy levels that are  
345 comparable to previous reports [15]. Specifically, we used neural network models applied to  
346 hippocampal recordings to predict whether a previously learned item would be remembered, with  
347 offline results exceeding those previously reported [15], when equivalent metrics (F1-scores at

348 the optimal thresholds) are compared. Future studies with larger sample sizes will confirm  
349 whether reported decoding accuracy can be generalized across subjects. It should be noted that  
350 we tested the decoding algorithm in one participant using the model pretrained with recordings  
351 from a different device with different noise levels (Fig. 1g), hence it is reasonable to assume that  
352 performance could go up as more Neuro-stack data are incorporated into the pretrained model.  
353 Given the increasing benefit of using machine learning approaches [47-49] in neuroscience  
354 studies, the Neuro-stack could be useful for validating decoding models and testing novel closed-  
355 loop stimulation therapies (e.g., to improve memory in patients with severe memory impairments).

356 Future studies can also determine which stimulation parameters are most beneficial for  
357 restoring cognitive or behavioral functions given the Neuro-stack's highly flexible programmability  
358 compared to existing human-approved stimulators. For example, continuous adjustments of  
359 custom pulse shapes, timing of complex burst patterns, and/or timing of stimulation relative to  
360 ongoing neural activity events could allow for the development of more effective stimulation  
361 therapies. Given the wireless and wearable nature of the Neuro-stack, studies could also  
362 determine whether closed-loop stimulation protocols effectively translate to more naturalistic  
363 behaviors during everyday experiences that occur during mobility.

364 While the Neuro-stack offers several advantages over currently available systems, there  
365 are limitations that warrant discussion. First, this Neuro-stack prototype can only support a  
366 maximum of 32 wide-band single-unit recording channels. While it can also simultaneously record  
367 up to 256 LFP recording channels (using four analog layers), other existing bedside systems can  
368 allocate more than 256 channels solely for unit recordings. The use of multiple Neuro-stack  
369 devices, however, would address this issue and increase single-unit channel count substantially.  
370 Second, although the Neuro-stack is small enough to be carried on-body and thus allow for full  
371 mobility, its connection with implanted electrodes is still wired, similar to other bedside systems.  
372 Thus, significant movements can result in motion artifacts. However, single-unit spike waveforms  
373 can still be detected and isolated during walking behavior as we show using techniques such as

374 differential recordings between nearby contacts, as well as proper wire isolation and fixation.  
375 Lastly, the Neuro-stack currently can only be used in research studies with patients who have  
376 externalized electrodes implanted during clinical (e.g., epilepsy) monitoring. Since these patients  
377 need to be continuously tethered to bedside intracranial recording systems to assess for  
378 symptomatic episodes (e.g., seizures), this limits the amount of time a patient can be freely-  
379 moving. However, future studies can complete ambulatory studies after clinical data has been  
380 captured as was done in the current study, on the last day of the patient's hospital stay prior to  
381 electrode de-plantation surgery, or during circumstances where continuous monitoring may not  
382 be necessary (e.g., depression or chronic pain studies [51-52]). Furthermore, proper precautions  
383 and safety measures should be implemented, such as waiting to complete studies until epilepsy  
384 patients are back on anti-epileptic medications to minimize risks associated with seizures during  
385 ambulatory tasks.

386         Although Neuro-stack is much smaller than other external systems, an even smaller  
387 version could be tested in future in-vivo studies since its IC chips are all implantable by design  
388 [29-33, 37] and require a combined area of just 113 mm<sup>2</sup> (4 analog layers). An implantable version  
389 of the Neuro-stack [30] but with its added single-neuron and closed-loop stimulation capabilities  
390 thus presents an exciting avenue towards a completely wireless intracranial single-unit and LFP  
391 recording system that would not be susceptible to motion artifacts. This type of system would  
392 present a significant advancement over current FDA-approved chronic neurostimulation devices  
393 in that it would allow for single-neuron and multi-channel (current state-of-the-art is 4 channels;  
394 Neuropace RNS) recordings, bi-directional recording and stimulation (full-duplex) capability, and  
395 the ability to use advanced strategies for decoding (e.g., neural network models for inference)  
396 behavior or disease-related states. Altogether, these novel capabilities would provide cognitive  
397 and clinical neuroscience studies with a promising future pathway towards determining the deep-  
398 brain mechanisms of naturalistic behavior in humans and developing more effective closed-loop  
399 intracranial neuromodulation strategies for individuals with debilitating brain disorders.

## 400 **Contributions**

401 Conceptualization: D.M., N.S., I.F., N.P., U.T., and S.B.; Methodology and Software: U.T., S.B.,  
402 C.L., A.A., W.Y., V.H., H.C, D.R., W.J., and S.B-K; Investigation and data acquisition: U.T., S.B.,  
403 C.L., C.S.I., J.G., and S.L.M.; Resources: A.F., A.B., D.E., I.F., N.S., and D.M.; Writing – Original  
404 Draft: U.T., N.S., and D.M.; Writing – Review and Editing: all authors; Visualization: U.T.; Funding:  
405 I.F., N.S. and D.M.

## 406 **Declaration of Interest**

407 The authors declare that there is no conflict of interest.

## 408 **Acknowledgments**

409 This work was supported by DARPA SUBNETS (to D.M.), DARPA RAM (to IF and DM), the  
410 McKnight Foundation, NIH grants UO1 NS103802 and NS103780 (to N.S.), F30MH125534 (to  
411 S.L.M.), and NIH grant RO1 NS084017 (to IF). The authors thank Sonja Hiller, Edward Chang,  
412 Natalie Cherry, Guldamlä Kalender, Andreina M. Hampton, Anthony J. Rangel, and Omar Morales  
413 for helpful discussions and assistance in the Neuro-stack design and testing. The authors also  
414 thank the participants for taking part in the in-vivo validation studies.

## 415 References

1. Gardner, R.J., Hermansen, E., Pachitariu, M., ... Moser, E.I. (2022). Toroidal topology of population activity in grid cells. *Nature*, 602, 123–128.
2. Musall, S., Kaufman, M. T., Juavinett, A. L., Gluf, S., & Churchland, A. K. (2019). Single-trial neural dynamics are dominated by richly varied movements. *Nature Neuroscience*, 22(10). Schulze-Bonhage, A. (2017). Brain stimulation as a neuromodulatory epilepsy therapy. *Seizure*, 44, 169–175.
3. Schulze-Bonhage, A. (2017). Brain stimulation as a neuromodulatory epilepsy therapy. *Seizure*, 44, 169–175.
4. Benabid, A. L., Pollak, P., Louveau, A., Henry, S., & de Rougemont, J. (1987). Combined (thalamotomy and stimulation) stereotactic surgery of the VIM thalamic nucleus for bilateral Parkinson disease. *Applied Neurophysiology*, 50(1–6), 344–346.
5. Vidailhet, M., Vercueil, L., Houeto, J.-L., Krystkowiak, P., Benabid, A.-L., Cornu, P., Lagrange, C., Tézenas du Montcel, S., Dormont, D., Grand, S., Blond, S., Detante, O., Pillon, B., Ardouin, C., Agid, Y., Destée, A., Pollak, P., & French Stimulation du Pallidum Interne dans la Dystonie (SPIDY) Study Group. (2005). Bilateral Deep-Brain Stimulation of the Globus Pallidus in Primary Generalized Dystonia. *New England Journal of Medicine*, 352(5), 459–467.
6. Ressler, K. J., & Mayberg, H. S. (2007). Targeting abnormal neural circuits in mood and anxiety disorders: from the laboratory to the clinic. *Nature Neuroscience*, 10(9), 1116–1124.
7. Nuttin, B., Cosyns, P., Demeulemeester, H., Gybels, J., & Meyerson, B. (1999). Electrical stimulation in anterior limbs of internal capsules in patients with obsessive-compulsive disorder. *The Lancet*, 354(9189), 1526.
8. Lozano, A. M., Fosdick, L., Chakravarty, M. M., Leoutsakos, J.-M., Munro, C., Oh, E., Drake, K. E., Lyman, C. H., Rosenberg, P. B., Anderson, W. S., Tang-Wai, D. F., Pendergrass, J. C., Salloway, S., Asaad, W. F., Ponce, F. A., Burke, A., Sabbagh, M., Wolk, D. A., Baltuch, G., ... Smith, G. S. (2016). A Phase II Study of Fornix Deep Brain Stimulation in Mild Alzheimer's Disease. *Journal of Alzheimer's Disease*, 54(2), 777–787.
9. Thompson, R. F., & Kim, J. J. (1996). Memory systems in the brain and localization of a memory. *Proceedings of the National Academy of Sciences of the United States of America*, 93(24).
10. Bartolomei, F., Chauvel, P., & Wendling, F. (2008). Epileptogenicity of brain structures in human temporal lobe epilepsy: A quantified study from intracerebral EEG. *Brain*, 131(7).
11. Blackrock Neurotech (research) – Available at: <https://blackrockneurotech.com/research>. (Accessed: December 3, 2021)
12. Neuralynx – Available at: <https://neuralynx.com>. (Accessed: December 3, 2021)
13. Nihon Kohden EEG system: EEG-1200 – Available at: <https://us.nihonkohden.com/products/eeg-1200>. (Accessed: December 3, 2021)
14. Ripple Neuro. Custom Neuroscience Research Tools – Available at: <https://rippleneck.com>. (Accessed: December 3, 2021)
15. Ezzyat, Y., Kragel, J. E., Burke, J. F., Levy, D. F., Lyalenko, A., Wanda, P., O'Sullivan, L., Hurley, K. B., Busygin, S., Pedisich, I., Sperling, M. R., Worrell, G. A., Kucewicz, M. T., Davis, K. A., Lucas, T. H., Inman, C. S., Lega, B. C., Jobst, B. C., Sheth, S. A., ... Kahana, M. J. (2017). Direct Brain Stimulation Modulates Encoding States and Memory Performance in Humans. *Current Biology*, 27(9), 1251–1258.
16. Suthana, N., Haneef, Z., Stern, J., Mukamel, R., Behnke, E., Knowlton, B., & Fried, I. (2012). Memory enhancement and deep-brain stimulation of the entorhinal area. *New England Journal of Medicine*.
17. Inman, C. S., Manns, J. R., Bijanki, K. R., Bass, D. I., Hamann, S., Drane, D. L., Fasano, R. E., Kovach, C. K., Gross, R. E., & Willie, J. T. (2018). Direct electrical stimulation of the amygdala enhances declarative memory in humans. *Proceedings of the National Academy of Sciences of the United States of America*, 115(1).
18. Titiz, A. S., Hill, M. R. H., Mankin, E. A., Aghajan, Z. M., Eliashiv, D., Tchemodanov, N., Maoz, U., Stern, J., Tran, M. E., Schuette, P., Behnke, E., Suthana, N. A., & Fried, I. (2017). Theta-burst microstimulation in the human entorhinal area improves memory specificity. *ELife*, 6.
19. Mankin, E. A., & Fried, I. (2020). Modulation of Human Memory by Deep Brain Stimulation of the Entorhinal-Hippocampal Circuitry. In *Neuron* (Vol. 106, Issue 2).
20. Mankin, E. A., Aghajan, Z. M., Schuette, P., Tran, M. E., Tchemodanov, N., Titiz, A., Kalender, G., Eliashiv, D., Stern, J., Weiss, S. A., Kirsch, D., Knowlton, B., Fried, I., & Suthana, N. (2021). Stimulation of the right entorhinal white matter enhances visual memory encoding in humans. *Brain Stimulation*, 14(1).
21. Kucewicz, M. T., Berry, B. M., Miller, L. R., Khadjevand, F., Ezzyat, Y., Stein, J. M., ... Worrell, G. A. (2018). Evidence for verbal memory enhancement with electrical brain stimulation in the lateral temporal cortex. *Brain*, 141(4), 971–978.



22. Ezzyat, Y., Wanda, P. A., Levy, D. F., Kadel, A., Aka, A., Pedisich, I., ... Kahana, M. J. (2018). Closed-loop stimulation of temporal cortex rescues functional networks and improves memory. *Nature Communications*, 9(1), 365.
23. Zemann, R., Paulk, A. C., Basu, I., Sarma, A., Yousefi, A., Crocker, B., Eskandar, E., Williams, Z., Cosgrove, G. R., Weisholtz, D. S., Dougherty, D. D., Truccolo, W., Widge, A. S., & Cash, S. S. (2020). CLoSES: A platform for closed-loop intracranial stimulation in humans. *NeuroImage*, 223.
24. Kuo, C.-H., White-Dzuro, G. A., & Ko, A. L. (2018). Approaches to closed-loop deep brain stimulation for movement disorders. *Neurosurgical Focus*, 45(2), E2.
25. Little, S., Pogosyan, A., Neal, S., Zavala, B., Zrinzo, L., Hariz, M., ... Brown, P. (2013). Adaptive deep brain stimulation in advanced Parkinson disease. *Annals of Neurology*, 74(3), 449–457.
26. Swann, N. C., de Hemptinne, C., Thompson, M. C., Miocinovic, S., Miller, A. M., Gilron, R., ... Starr, P. A. (2018). Adaptive deep brain stimulation for Parkinson's disease using motor cortex sensing. *Journal of Neural Engineering*, 15(4), 046006.
27. Sun, F. T., & Morrell, M. J. (2014). The RNS System: Responsive cortical stimulation for the treatment of refractory partial epilepsy. *Expert Review of Medical Devices*, 11(6).
28. Cummins, D. D., Kochanski, R. B., Gilron, R., Swann, N. C., Little, S., Hammer, L. H., & Starr, P. A. (2021). Chronic Sensing of Subthalamic Local Field Potentials: Comparison of First and Second Generation Implantable Bidirectional Systems Within a Single Subject. *Frontiers in Neuroscience*, 15.
29. Stanslaski, S., Herron, J., Chouinard, T., Bourget, D., Isaacson, B., Kremen, V., Opri, E., Drew, W., Brinkmann, B. H., Gunduz, A., Adamski, T., Worrell, G. A., & Denison, T. (2018). A Chronically Implantable Neural Coprocessor for Investigating the Treatment of Neurological Disorders. *IEEE Transactions on Biomedical Circuits and Systems*.
30. Kremen, V., Brinkmann, B. H., Kim, I., Guragain, H., Nasser, M., Magee, A. L., Pal Attia, T., Nejedly, P., Sladky, V., Nelson, N., Chang, S. Y., Herron, J. A., Adamski, T., Baldassano, S., Cimbalk, J., Vasoli, V., Fehrmann, E., Chouinard, T., Patterson, E. E., ... Worrell, G. A. (2018). Integrating brain implants with local and distributed computing devices: A next generation epilepsy management system. *IEEE Journal of Translational Engineering in Health and Medicine*.
31. Gilron, R., Little, S., Perrone, R., Wilt, R., de Hemptinne, C., Yaroshinsky, M. S., Racine, C. A., Wang, S. S., Ostrem, J. L., Larson, P. S., Wang, D. D., Galifianakis, N. B., Bledsoe, I. O., San Luciano, M., Dawes, H. E., Worrell, G. A., Kremen, V., Borton, D. A., Denison, T., & Starr, P. A. (2021). Long-term wireless streaming of neural recordings for circuit discovery and adaptive stimulation in individuals with Parkinson's disease. *Nature Biotechnology*, 39(9).
32. Stangl, M., Topalovic, U., Inman, C. S., Hiller, S., Villaroman, D., Aghajan, Z. M., Christov-Moore, L., Hasulak, N. R., Rao, V. R., Halpern, C. H., Eliashiv, D., Fried, I., & Suthana, N. (2021). Boundary-anchored neural mechanisms of location-encoding for self and others. *Nature*, 589(7842).
33. Jiang, W., Hokhikyan, V., Chandrakumar, H., Karkare, V., & Markovic, D. (2016). 28.6 A  $\pm$ 50mV linear-input-range VCO-based neural-recording front-end with digital nonlinearity correction. *2016 IEEE International Solid-State Circuits Conference (ISSCC)*, 484–485.
34. Rozgic, D., Hokhikyan, V., Jiang, W., Akita, I., Basir - Kazeruni, S., Chandrakumar, H., & Markovic, D. (2018). A 0.338cm, Artifact-Free, 64-Contact Neuromodulation Platform for Simultaneous Stimulation and Sensing. *IEEE Transactions on Biomedical Circuits and Systems*, 13(1), 1–1.
35. Rozgic, D., Hokhikyan, V., Jiang, W., Basir-Kazeruni, S., Chandrakumar, H., Leng, W., & Markovic, D. (2017). A true full-duplex 32-channel 0.135cm<sup>3</sup> neural interface. *2017 IEEE Biomedical Circuits and Systems Conference (BioCAS)*, 1–4.
36. Basir-Kazeruni, S., Vlaski, S., Salami, H., Sayed, A. H., & Markovic, D. (2017). A blind Adaptive Stimulation Artifact Rejection (ASAR) engine for closed-loop implantable neuromodulation systems. *International IEEE/EMBS Conference on Neural Engineering, NER*, 186–189.
37. Chandrakumar, H., & Markovic, D. (2017). An 80-mVpp linear-input range, 1.6-G  $\Omega$  input impedance, low-power chopper amplifier for closed-loop neural recording that is tolerant to 650-mVpp common-mode interference. *IEEE Journal of Solid-State Circuits*, 52(11).
38. Zangiabadi, N., Ladino, L. Di., Sina, F., Orozco-Hernández, J. P., Carter, A., & Téllez-Zenteno, J. F. (2019). Deep brain stimulation and drug-resistant epilepsy: A review of the literature. In *Frontiers in Neurology* (Vol. 10, Issue JUN).
39. Koeglsperger, T., Palleis, C., Hell, F., Mehrkens, J. H., & Bötzel, K. (2019). Deep brain stimulation programming for movement disorders: Current concepts and evidence-based strategies. *Frontiers in Neurology*, 10(MAY).
40. Ramasubbu, R., Lang, S., & Kiss, Z. H. T. (2018). Dosing of electrical parameters in deep brain stimulation (DBS) for intractable depression: A review of clinical studies. In *Frontiers in Psychiatry* (Vol. 9, Issue JUL).

41. Alzuhair, A., & Marković, D. (2018). A 216 nW/channel DSP engine for triggering theta phase-locked brain stimulation. *2017 IEEE Biomedical Circuits and Systems Conference, BioCAS 2017 - Proceedings, 2018-Janua*, 1–4.
42. Alzuhair, A. (2019). Theta Phase-Specific Closed-Loop Stimulation in Implantable Neuromodulation Devices (Accession No. 22622710) [Doctoral dissertation, University of California, Los Angeles]. ProQuest Dissertations Publishing.
43. Fried, I., Wilson, C. L., Maidment, N. T., Engel, J., Behnke, E., Fields, T. A., Macdonald, K. A., Morrow, J. W., & Ackerson, L. (1999). Cerebral microdialysis combined with single-neuron and electroencephalographic recording in neurosurgical patients: Technical note. *Journal of Neurosurgery*, *91*(4).
44. Chaure, F. J., Rey, H. G., & Quian Quiroga, R. (2018). A novel and fully automatic spike-sorting implementation with variable number of features. *Journal of Neurophysiology*, *120*(4).
45. Selvaraju, R. R., Cogswell, M., Das, A., Vedantam, R., Parikh, D., & Batra, D. (2020). Grad-CAM: Visual Explanations from Deep Networks via Gradient-Based Localization. *International Journal of Computer Vision*, *128*(2).
46. Moser, M. B., Rowland, D. C., & Moser, E. I. (2015). Place cells, grid cells, and memory. *Cold Spring Harbor Perspectives in Biology*, *7*(2).
47. Anumanchipalli, G. K., Chartier, J., & Chang, E. F. (2019). Speech synthesis from neural decoding of spoken sentences. *Nature*, *568*(7753), 493–498.
48. Pandarinath, C., Ames, X. K. C., Russo, A. A., Farshchian, A., Lee, X., Miller, E., ... Kao, J. C. (2018). *Latent Factors and Dynamics in Motor Cortex and Their Application to Brain-Machine Interfaces*.
49. Livezey, J. A., & Glaser, J. I. (2021). Deep learning approaches for neural decoding across architectures and recording modalities. In *Briefings in Bioinformatics* (Vol. 22, Issue 2).
50. Sheth, S. A., Bijanki, K. R., Metzger, B., Allawala, A., Pirtle, V., Adkinson, J. A., Myers, J., Mathura, R. K., Oswald, D., Tsolaki, E., Xiao, J., Noecker, A., Strutt, A. M., Cohn, J. F., McIntyre, C. C., Mathew, S. J., Borton, D., Goodman, W., & Pouratian, N. (2022). Deep Brain Stimulation for Depression Informed by Intracranial Recordings. *Biological Psychiatry*.
51. Scangos, K. W., Makhoul, G. S., Sugrue, L. P., Chang, E. F., & Krystal, A. D. (2021). State-dependent responses to intracranial brain stimulation in a patient with depression. *Nature Medicine*, *27*(2).
52. Sandha, S. S., Noor, J., Anwar, F. M., & Srivastava, M. (2020). Time awareness in deep learning-based multimodal fusion across smartphone platforms. *Proceedings - 5th ACM/IEEE Conference on Internet of Things Design and Implementation, IoTDI 2020*.
53. Suthana, N. A., Parikhshak, N. N., Ekstrom, A. D., Ison, M. J., Knowlton, B. J., Bookheimer, S. Y., & Fried, I. (2015). Specific responses of human hippocampal neurons are associated with better memory. *Proceedings of the National Academy of Sciences*, *112*(33), 10503–10508.
54. Jenkinson, M., Bannister, P., Brady, M., & Smith, S. (2002). Improved optimization for the robust and accurate linear registration and motion correction of brain images. *NeuroImage*, *17*(2).
55. Yushkevich, P. A., Pluta, J. B., Wang, H., Xie, L., Ding, S. L., Gertje, E. C., Mancuso, L., Klot, D., Das, S. R., & Wolk, D. A. (2015). Automated volumetry and regional thickness analysis of hippocampal subfields and medial temporal cortical structures in mild cognitive impairment. *Human Brain Mapping*, *36*(1).
56. Zhang, Y., Brady, M., & Smith, S. (2001). Segmentation of brain MR images through a hidden Markov random field model and the expectation-maximization algorithm. *IEEE Transactions on Medical Imaging*, *20*(1). <https://doi.org/10.1109/42.906424>
57. Kassner, M., Patera, W., & Bulling, A. (2014). Pupil. *Proceedings of the 2014 ACM International Joint Conference on Pervasive and Ubiquitous Computing Adjunct Publication - UbiComp '14 Adjunct*, 1151–1160.
58. Toglia, M. P., & Battig, W. F. (1978). *Handbook of semantic word norms*. Lawrence Erlbaum.
59. Srivastava, N., Hinton, G., Krizhevsky, A., Sutskever, I., & Salakhutdinov, R. (2014). Dropout: A simple way to prevent neural networks from overfitting. *Journal of Machine Learning Research*, *15*.

## 416 **Online Methods**

### 417 **Neuro-stack Hardware Design**

418 Neuro-stack was built from four implantable and previously reported application-specific integrated circuit  
419 (IC) chips. The Sense IC contains 32 low-noise, high dynamic range LFP sensing front-ends (FEs), which  
420 can be duplexed to 32 electrodes for single-ended recording with respect to the reference electrode or to  
421 32 pairs of electrodes for differential recording, matching up to 64-electrode probe (or  $8 \times 10$ -electrode  
422 probes, where the 9<sup>th</sup> is a reference and the 10<sup>th</sup> a ground contact). After linearization in the nonlinearity  
423 correction (NLC) module, the recorded output can be optionally sent to 4 adaptive stimulation artifact  
424 rejection (ASAR) engines, which suppress stimulation artifacts. The signal processing chain of  
425 FE+NLC+ASAR provides the ability to sense neural activity concurrent with stimulation. Each of the steps  
426 in this chain can be configured and included/bypassed in the pipeline. The Sense IC provides a three-wire  
427 SPI interface. It also down-streams the commands to control the Stim IC. The controller integrated into the  
428 Sense IC implements the state machine for serial peripheral interface (SPI) communication, schedules the  
429 data for the sensing output, and features the capability of individual control of every FE/NLC/ASAR module  
430 [33-36]. The phase-locked stimulation (PLS) IC is a previously developed digital chip that supports 16-  
431 channel detection of the power at selectable frequencies within theta band (3–8 Hz), and triggers configured  
432 stimulation at a specified phase of the detected oscillation [41-42].

433 We designed a layout and manufactured a digital (Fig. 1b-middle) and an analog printed circuit  
434 board (PCB, Fig. 1b-bottom) using specialized software (Altium Designer 14.0) where each board consisted  
435 of 2 PCB layers. The Sense, Stim, and Spike IC footprints were placed on the analog layer and the PLS IC  
436 footprint on the digital layer. The SPI interface was routed from the analog layer input/output connector to  
437 the Sense IC and from the Sense IC to the Stim IC (Fig. 1b-right). We used a SPI with 3 wires: clock, master  
438 input/output slave (MISO), and master output/input slave (MOSI). Two-wire shift register interfaces were  
439 routed from the analog/digital layer input/output connector to the PLS IC/Spike IC (Fig. 1b-right). The  
440 sensing and stimulation FEs were routed to the two Omnetics PS1-16-AA connectors to which electrodes  
441 are connected. The digital and analog layer input/output connectors are compatible and can be stacked on  
442 top of each other. On the top connector, we placed the Xilinx Spartan 6 (XC6SLX150-2FGG484C) FPGA  
443 board to serve the role of the communication layer (Fig. 1a-top). The FPGA is configured to support four

444 SPI interfaces and five shift registers, thus allowing up to four analog layers to be stacked together. We  
445 used a two-analog layer setup for all in-vitro and in-vivo experiments. Since we used separate SPI  
446 interfaces for each analog layer IC, the 4<sup>th</sup> wire (select) on the SPI was not needed in the PCB design. The  
447 FPGA contains a finite state machine (FSM) that converts USB input (FTDI controller) into SPI (SPI  
448 controller) packet stream and vice-versa. For FPGA programming, we used the Xilinx ISE 14.2 software.  
449 Briefly, The FSM always begins with a Reset state after a reboot, and then enters an Idle state in which it  
450 waits for incoming packets. Once a packet is available, the FSM receives it byte by byte (Receive Byte)  
451 until the complete message is transferred (Receive Packet). The received packet is then being processed  
452 (Process Packet), converted into the appropriate interface (e.g., USB to SPI), and transmitted to the Neuro-  
453 stack ICs (via SPI or Shift Register). Similarly, after the processing is done, the response packet from the  
454 ICs enters a state during which it can transmit the packet (Transmit Packet) byte by byte (Transmit Byte)  
455 externally. Once the transmission is done, the FSM goes back to the Idle state and waits for new packets  
456 unless the streaming of the neural data is taking place, in which case the FSM enters Process Packet state  
457 indefinitely until the recording is stopped (Fig. S3-left). Stacked layers were placed inside a plastic enclosure  
458 (Fig. 1a) and wrapped from the inside with copper foil shielding tape to reduce the impact of the noise.  
459 Custom headstages (Fig. 1b, d) were built on a protoboard by placing two 5 × 2 connectors on each, which  
460 were internally routed to the Omnetics connector.

461 Neuro-stack's communication layer uses a USB interface for external connections and a specific  
462 communication protocol that can address, configure, and start/stop each IC. The protocol is described by  
463 a packet structure (up to 520 bytes) that captures Command (such as Reset, Start/Stop, Read/Write  
464 configuration registers, etc.), Board ID (to select analog layer), Spike and PLS commands, and optional  
465 Payload (varies in length [Payload Length] depending on the command). The FPGA's FSM processes the  
466 input packet and decides which IC is to be addressed and forwards relevant bytes to it. The protocol also  
467 includes safety error and cyclic redundancy check bytes (Fig S3-bottom). Every command returns its  
468 specific acknowledgment receipt indicating that the execution of the command was successful.

## 469 **Neuro-stack Software Design**

470 The Neuro-stack graphical user interface (GUI, Fig. 1a) was built as a Universal Windows Platform  
471 application using Visual Studio (2017) and the Visual C# language. The application can be installed on any

472 Windows (8.1 or higher) machine. We specifically used Surface Pro 5 for running the GUI application. The  
473 application uses a USB connection to directly communicate with the Neuro-stack (Fig. 1a) to enable viewing  
474 and configuration of real-time neural data, the configuration of PLS and other stimulation parameters, and  
475 manually triggered delivery of stimulation.

476 As an alternative to the GUI, the Neuro-stack application programming interface (API) is a library  
477 of functions built-in C++ that the user can call in custom-design experiments. The API combines all core  
478 and backhand GUI functions into a faster and more resource-efficient implementation. It's built as a multi-  
479 thread real-time software pipeline, which threads mirror hardware blocks (e.g., Sense Process controls the  
480 Sense IC, Stim Process controls the Stim IC, etc. [Fig. S3-middle]). Processes responsible for each IC run  
481 in parallel and asynchronously forward commands to their associated IC or they await a command receipt  
482 or a recorded neural sample via the Input Queue (Fig. S3-middle). Neural samples are timestamped using  
483 network time protocol [NTP, 52] in the Sense and Spike Process threads upon their arrival. They are sent  
484 together with a sample value either to an external device or stored in Log Memory (Fig. S3-middle), which  
485 was used for synchronization. The library can be compiled for commonly used Linux, Windows, macOS, or  
486 ARM based target devices. We used the ARM-based (NXP i.MX 8M SoC) Coral Development Board to run  
487 the Neuro-stack API. To utilize all Coral Development Board capabilities, we complemented the library with  
488 functions that can store/save the TensorFlow Lite model and run inference on recorded neural samples  
489 using the Coral dev Board's onboard tensor processing unit (TPU). Coral dev Board supports both wired  
490 (USB-C) and wireless (using a local network access point and a TCP/IP server with a X.509 certificate  
491 authentication) interfaces with external control capability and use of a real-time monitoring device (e.g.,  
492 Experimental Computer). X.509 is a digital certificate that uses public key infrastructure. We used self-  
493 signed certificates since we only used one Experimental Computer to connect to the Neuro-stack. We used  
494 a MacBook Pro (2015) laptop as an Experimental Computer, which ran a client Python 3.6.9 script for  
495 triggering sensing, stimulation, TPU-specific commands, and transferring/storing/monitoring neural activity  
496 by using the Neuro-stack API running on the Coral dev Board (Fig. S3).

497 For in-vivo resting state neural recording experiments, we used the GUI application to control the  
498 Neuro-stack (Fig. 1). For in-vitro testing, in-vivo macro-stimulation (Fig. 3), behavioral stationary (Fig. 4)

499 and ambulatory experiments (Fig. 2), we used the Neuro-stack API and Coral dev Board wireless  
500 configuration (Fig S3).

### 501 **Neuro-stack in-vitro testing**

502 In-vitro studies involved the use of an oscilloscope, a phosphate-buffered saline (PBS) solution, a National  
503 Instruments digital to analog converter (NI-DAC), and the Neuro-stack (using both wired and wireless  
504 configurations; Fig. S4). Testing of the Sense and Spike ICs involved feeding 100 s of pre-recorded  
505 LFP/single-unit data through the NI-DAC. The analog signals were observed using an oscilloscope and  
506 recorded by a single channel using the Neuro-stack. For visualizing results, a time domain comparison was  
507 used for Sense IC and Spike IC (Fig. S5). The Stim IC was tested as part of closed-loop delay  
508 measurements and in previous reports [34]. Delivered stimulation was captured by the oscilloscope and on  
509 one channel using the Neuro-stack (Fig. S4, S5). The PLS IC was tested in-vitro as part of a previous study  
510 [41-42].

511 The round-trip delays were measured by sending a pulse train (50 pulses, 20 mV amplitude, 1 s  
512 pulse width, duty cycle 50%) from the NI-DAC to one channel recorded using the Neuro-stack. The modified  
513 software on the Coral dev Board continuously pooled incoming samples and detected the increase from  
514 zero (rising edge) in these incoming values. Once detected the rising edge triggered one-pulse of  
515 stimulation. The delay (mean  $\pm$  standard deviation [std] for 50 pulses) was measured on the oscilloscope  
516 by capturing both the recording input and stimulation output rising edges and their time difference (Fig.  
517 S5d).

518 The Neuro-stack system and software latency from the recording input to the Sense Process thread  
519 on the Coral dev Board was measured using the same pulse train process but instead of triggering  
520 stimulation, the detected rising edge triggers a 1 s pulse to the Coral dev Board general-purpose  
521 input/output (GPIO) pin. We used the oscilloscope to observe the recording input and GPIO output, and  
522 measure the time difference between the rising edges (Fig. S5), which was equivalent to the system latency  
523 (mean  $\pm$  std for 50 pulses).



## 524 **Neuro-stack in-vivo testing**

### 525 ***Participants***

526 Research participants were 12 patients (mean age 24.15 years, 9 females) with pharmaco-resistant epilepsy  
527 who were previously implanted with acute stereo EEG depth electrodes for seizure monitoring. Participants  
528 volunteered for the research study during their hospital stay by providing informed consent according to a  
529 research protocol approved by the UCLA IRB. In each patient, 8-12 flexible polyurethane depth electrodes  
530 (1.25 mm diameter) were implanted solely for clinical purposes and prior to completion of the research  
531 study. Each depth electrode terminated in a set of eight insulated 40- $\mu$ m platinum-iridium microwires  
532 (impedances 200-500 k $\Omega$ ).

### 533 ***Electrode Localization***

534 Electrodes were localized to specific brain regions using methods that have been previously used [53].  
535 Briefly, a high-resolution post-operative CT scan was co-registered to a pre-operative whole brain MRI and  
536 high-resolution MRI using BrainLab stereotactic localization software ([www.brainlab.com](http://www.brainlab.com) and FSL FLIRT  
537 (FMRIB's Linear Registration Tool [54]). Medial temporal lobe (MTL) regions, including the hippocampus  
538 and entorhinal cortex, were delineated using the Automatic Segmentation of Hippocampal Subfields (ASHS  
539 [55]) software using boundaries determined from MRI visible landmarks that correlate with underlying  
540 cellular histology. White matter and cerebral spinal fluid areas were outlined using FSL FAST software [56].  
541 Macro- and micro-electrode contacts were identified and outlined on the post-operative CT. For a list of  
542 localized brain regions in all participants see Table S1.

### 543 **Data Acquisition and Stimulation**

544 For all in-vivo validation sessions, a Neuro-stack with two analog layers was used, which allowed for up to  
545 two micro-electrode bundles (16 channels) and eight macro-electrodes (16 bipolar channels). All micro-  
546 and macro-electrode recording sessions were sampled at 38.6 kHz and 6250 Hz, respectively. Base  
547 recordings were done without hardware decimation, non-linear correction, and artifact rejection on the  
548 Sense IC. Refer to *Data Analysis and Statistics* section for details about data analyses.

549 Macro-stimulation was performed in three participants while they rested in their hospital beds. In  
550 the first two participants, three stimulation bursts (0.5 mA) were delivered to a single bipolar electrode



551 channel. In a third participant, we performed stimulation propagation mapping, where macro-stimulation  
552 was delivered to a single bipolar channel (Fig. 3c-d) and recording was done in the other 32 channels (Fig.  
553 3e,h,i). During macro-stimulation, signal propagation was observed with using the following stimulation  
554 parameters: Channels: 1 out of 128; Amplitude: 0.25, 0.5, 0.75, 1.00, and 1.25 mA; Frequency: 60, 80, 100,  
555 120, and 140 Hz; Pulse Width: 1.28 ms; Interphase Width: 150 us; Polarity: Anodic; Shape: Rectangular;  
556 Interburst delay: 16.67 s. The desired burst frequency was achieved by setting the inter-pulse delay  
557 appropriately.

558         Rectangular pulses recorded in all 32 channels were identified by using cross-correlation across  
559 all channels against a template waveform of the delivered stimulation pulse, which was later used for  
560 alignment (Fig. 3f,g) and calculating statistics of propagation with respect to varying amplitudes (Fig. 3h)  
561 and frequencies (Fig. 3i). For statistical calculations of the propagated power, all pulse waveforms across  
562 channels were normalized using the same value of the largest pulse that was propagated.

### 563 **Ambulatory Walking Task**

564 Single-unit data was recorded in six participants during an ambulatory walking task. Two of the participants  
565 were instructed to walk around their hospital room freely and visit prominent 'landmarks' such as locations  
566 near windows, doors, tables, etc. A separate group of four participants was instructed to walk repeatedly  
567 (10 times) from one position to another position in the room using a linear path (Fig. S2b). The ambulatory  
568 movement was tracked using an eye-tracking headset (Pupil Labs Core device [57]) which contained  
569 inward-facing eye cameras (sampling rate: 200 frames per s) and an outward-facing world-view camera  
570 (sampling rate: 120 frames per s). Neuro-stack was connected to two micro-wire electrode bundles  
571 (Behnke-Fried, Ad-Tech) to record from 18 micro-wire contacts (16 recorded single-unit activity and 2  
572 served as reference contacts). Recordings with respect to local references (same bundle) were recorded  
573 at a sampling rate of 38.6 kHz.

574         During the walking task, the participants wore an eye-tracker headset and a small backpack (Fig.  
575 2a), which carried the Neuro-stack, the TPU (Coral dev Board) using the wireless configuration (Fig. S3),  
576 and a Voltaic V75 USB Battery Pack. The researcher used an Experimental Computer running an  
577 application (Python) to start/stop recordings and view in real-time the neural data. Both the Neuro-stack  
578 and eye-tracker were connected to the same local network from which the NTP timestamps were fetched.

579 For a redundant method of synchronization, a miniature LED was attached to the corner of the world-view  
580 camera on the eye-tracking headset (Fig. 2a, Fig. S2d). The LED was programmed to turn on for 50 ms  
581 every 20 s during the experimental walking task, which was not visible by the participant and was also NTP-  
582 timestamped.

### 583 **Stationary Verbal Memory Task**

584 Verbal memory performance was decoded using the Neuro-stack in a single participant. The memory task  
585 began with an encoding period, where the participant was instructed to learn a list of 10 words that were  
586 randomly selected and serially presented in an audio and visual format on an iPad Pro (3<sup>rd</sup> generation)  
587 screen (Fig. S3 – top right). During encoding, each word was presented for 2 s with an inter-trial fixation  
588 period of 4 s. Words were drawn from clusters of six and seven of the word norms and were all 4-8 letter  
589 nouns that were rated as highly familiar (range 5.5-7 on a 1-7 scale), moderate to high on concreteness  
590 and imagery (range 4.5-6 on a 1-7 scale), and moderate in pleasantness (range 2.5-5.5 on a 1-7 scale)  
591 [58]. After the encoding period, participants completed a distractor task where they were instructed to  
592 determine whether a presented number (1-9) was Odd or Even. The distractor task was then immediately  
593 followed by a verbal recall period where participants were cued to verbalize as many words as they could  
594 remember during a 30 s period. During the experimental paradigm, encoding, distractor, and retrieval  
595 periods were repeated 10 times. Memory performance was calculated as the proportion of previously  
596 encoded verbalized words that were recalled.

597 During the verbal memory task, we used the Neuro-stack in a wireless configuration (Fig S3)  
598 together with both the Experimental Computer and Stimulus Presentation device (iPad). We used the Sense  
599 IC to record 16 channels from two (left/right hippocampus) micro-wire bundles. Stimulus presentation on  
600 the iPad was implemented as a game using Xcode 11.2.1 and Swift 5.0.1 programming languages. For  
601 network communication, we used two TCP (transmission control protocol) channels (Fig. 4b, Fig. S3; 1.  
602 Experimental Computer – Coral dev Board, 2. Experimental Computer – iPad). For online binary  
603 classification of the incoming neural data into remembered/forgotten words, we used a pretrained neural  
604 network model (2 × CNN1D + LSTM + Dense; Fig. 4e). The background processing of the task's data was  
605 divided into two phases: 1) training and 2) prediction, consisted of 5 and 4 blocks of the verbal memory task  
606 cycle, respectively (Fig. 4c, presented 7 blocks only; 3 training and 4 prediction). The purpose of the training

607 phase was to personalize the model for the participant. Only the last two Dense layers from the model were  
608 used for retraining and embedding selected filters into the prediction model. The training phase involved  
609 downsampling and filtering of raw data (0.1 – 250 Hz), packing the data separately for each observed brain  
610 region (Preprocess step), and transmitting packages from the Neuro-stack externally to the Experimental  
611 Computer where the model retraining took place (Fig. 4b). The words were presented using an iPad Pro  
612 tablet, which also used a built-in speech recognition algorithm to supply real-time outcomes (i.e.,  
613 remembered or forgotten) to the Experimental Computer. The word onset events were isolated and  
614 weighted using a Gaussian window where one standard deviation was 2.5 s and cutoffs were made at -5  
615 and 5 s (before and after word onset), thus giving data around the word onset higher priority. The retraining  
616 of the model took place during every Distraction phase (30 s) of the verbal memory task. Once retrained,  
617 the model was automatically converted on the Experimental Computer from Tensorflow 2.2 to Tensorflow  
618 Lite and uploaded wirelessly to the Edge TPU. During the prediction phase, the same format of  
619 preprocessed data was rerouted to the Edge TPU, where prediction took place. The predictions from TPU  
620 and labels from the iPad were transmitted to the Experimental Computer for performance assessment after  
621 each word trial (Fig. 4b).

### 622 ***Neural Network Model***

623 The neural network model (Fig. 4e) was used to decode performance on the verbal memory task in a single  
624 participant. The model architecture included two one-dimensional convolutional neural networks (CNN1D)  
625 (1st with 32 nodes and 2<sup>nd</sup> with 64 nodes) and a long-short term memory (LSTM) neural network layer with  
626 64 nodes. The L2 regularization was used in the CNN1D and Dense layers and was proportional to the  
627 square of the weight coefficients' value. Moreover, the training dropout technique [59] was applied after  
628 each layer with a 0.2 rate, except for the LSTM, which used a 0.1 rate and a recurrent dropout (0.5 rate).  
629 The complete structure of one branch is presented in Fig. 4e. The branches were structurally identical for  
630 all brain regions but had different weights after training. The model was pretrained offline using data from  
631 6 medial temporal lobe regions (left/right anterior hippocampus, left/right posterior hippocampus, left/right  
632 entorhinal cortex) from 10 participants who performed the exact same verbal memory task (Fig. 4a)  
633 previously using a Blackrock Neuroport system to record neural data. LFP data (sampling rate 250 Hz,  
634 batch size 512) was extracted around the verbal memory task word onsets (same Gaussian window as

635 before) and fed into the model for training (Fig. S6a). The data from all participants was divided into training  
636 (50%), validation (25%), and test (25%) sets. Then training and validation datasets were combined,  
637 shuffled, and used for training of the base model (Fig. S6c). Binary cross-entropy was used for the loss  
638 function, with root mean square propagation for the optimizer (learning rate of 0.001). Five-fold cross-  
639 validation (Fig. S6d – average across folds) was used for validation using the presented hyperparameters.  
640 Hyperparameter optimization of the final decoding model (Fig. 4e) was done during the validation phase  
641 and with respect to the F-1 score (0.5 threshold). During the training phase with Neuro-stack, we used the  
642 same training parameters except that CNN1D and LSTM layer coefficients were fixed and only Dense  
643 coefficients were adjusted. Also, we only used two model branches out of six that were previously trained  
644 on the Blackrock-acquired data (hippocampal channels only) to match the left/right hippocampal electrode  
645 placement in the single participant who performed the verbal memory task Neuro-stack experiment. During  
646 online training phase, all incoming windows of the LFP data were continuously combined with the previous  
647 windows and used for retraining, while new retraining iteration updated coefficients saved from the previous  
648 retraining block. Participants (Blackrock: B1-B10; Neuro-stack: N1), their memory performance during  
649 verbal memory task, and test accuracies using offline (B1-B10) and online (N1) models are shown in Fig.  
650 S6b.

651 To isolate frequency bands that were the most significant for the neural network model decisions,  
652 we adapted Grad-CAM [45] for one-dimensional CNN and applied it on each branch separately. By doing  
653 this, we isolated activation filters of the second CNN1D (Fig. 4f,g – time-frequency representation).

654 The above described neural network model was chosen after an extensive trial and error process  
655 during which multiple classification algorithms were tested on the same dataset. Specifically, before utilizing  
656 the neural network model, the data was classified using shallow methods such as Support Vector Machine  
657 (SVM). As part of the feature engineering process, we supplied SVM models with raw, power, and phase  
658 data in 0-250 Hz range chunks of 7 s (word onset at 3.5 s) or in a sequence of 1 s sliding time windows  
659 (with no overlap). Before choosing the final decoding model, we also tested several convolutional and  
660 recurrent neural network (RNN) architectures. Summary of accuracies for each of these decoding methods  
661 is presented in Table S3).

## 662 **Data Analysis and Statistics**

### 663 ***iEEG Power Spectrum Extraction***

664 All time-frequency power scalograms were obtained using CWT (Continuous Wavelet Transform - MATLAB  
665 *cwt* command) performed on z-scored time domain data (each channel normalized separately). The base  
666 wavelet chosen was the complex Morlet with a symmetry parameter ( $\gamma$ ) equal to 3 and a time-  
667 bandwidth product equal to 60. The wavelet coefficients were calculated at seventy logarithmic frequency  
668 points from 1 to 125 Hz, after which the squared absolute value of the coefficients resulted in a power  
669 scalogram.

670 All frequency power spectrums were obtained using FFT (Fast-Fourier Transform - MATLAB *fft*  
671 command). The FFT length chosen was the largest power of 2, less than the length of the observed iEEG  
672 trace. The coefficients were then normalized with the trace length. Finally, the squared absolute value of  
673 the spectral coefficients multiplied by 2 (one-sided FFT) resulted in the power spectrum.

### 674 ***Spike sorting***

675 We performed spike sorting using Wave\_clus 3 [44]. Preprocessing included the use of a notch-filter to  
676 remove 60 Hz noise. Selected clusters were chosen so that more than 250 spikes were identified and that  
677 out of these, 1% or less had inter-spike-intervals (ISI) of less than 3 ms.

## 678 **Data and Code Availability**

679 Data and code are available upon reasonable request.
